# Supplementary material
Source: PubMed Central journal article supplement (PMC3943900)
Supplement: NIHMS551151-supplement-01.pdf [file NIHMS551151-supplement-01.pdf]

# Supplemental Information

## Aryl-aldehyde formation in fungal polyketides: Discovery and characterization of a distinct biosynthesis mechanism

Meng Wang, Mirko Beissner, Huimin Zhao\*

### Inventory of Supplemental Information

Table S1: Primers used in this study, related to Plasmid Construction

Table S2: Bioinformatic analysis of the cryptic gene clusters containing NRPS-like genes, related to Figure 2

Figure S1A. Maps of the plasmids carrying the NR-PKS or NRPS-like gene, related to Plasmid Construction

Figure S1B. Strategy for assembling the two-gene ATEG\_03629\_03630 cassette, related to Plasmid Construction

Figure S1C. Map of the plasmid carrying the two-gene cassette consisting of the NR-PKS and NRPS-like genes, related to Plasmid Construction

Figure S1D. Map of the plasmid for over-expressing NRPS-like protein ATEG\_03630, related to Plasmid Construction

Figure S1E. Quantitative PCR analysis of the expression level of the target gene cluster in the native host *A. terreus*, related to Quantitative PCR Analysis

Figure S1F. Multiple sequence alignment of R domain of ATEG\_03630 with different short-chain dehydrogenases/reductases family proteins, related to Figure 2

Figure S1G. SDS-PAGE analysis of purified ATEG\_03630 WT and mutant proteins related to Figure 2

Figure S1H. Phylogenetic analysis of the SAT domains of homologous NR-PKSs, related to Figure 2

Figure S1I. Phylogenetic analysis of the TE domains of homologous NR-PKSs, related to Figure 2

Figure S1J. Phylogenetic analysis of the A domain of homologous NRPS-like genes, related to Figure 2

Figure S1K. HPLC-MS analysis of the culture extraction of native host *A. terreus*, related to Figure 2

Figure S1L. UV-Vis spectra of compounds 4 and 5, related to Figure 2

Figure S1M. HPLC-MS analysis of *in vitro* assay of NRPS-like protein ATEG\_03630 catalyzed reduction of 5-MOA after 15 min incubation, related to *In vitro* Characterization of ATEG\_03630 and its Mutants

Figure S1N. HPLC-MS analysis of *in vitro* assay of NRPS-like protein ATEG\_03630 catalyzed reduction of HPG, related to *In vitro* Characterization of ATEG\_03630 and its Mutants

Figure S1O. HPLC-MS analysis of *in vitro* assay of NRPS-like protein ATEG\_03630 catalyzed reduction of tyrosine, related to *In vitro* Characterization of ATEG\_03630 and its Mutants

Figure S1P. HPLC-MS analysis of *in vitro* assay of NRPS-like protein ATEG\_03630 catalyzed reduction of tryptophan, related to *In vitro* Characterization of ATEG\_03630 and its Mutants

Figure S1Q. HPLC-MS analysis of *in vitro* assay of NRPS-like protein ATEG\_03630 catalyzed reduction of phenylalanine, related to *In vitro* Characterization of ATEG\_03630 and its Mutants

Figure S1R. HPLC-MS analysis of culture extraction of native host *A. terreus* fed with 5-MOA or DMSO (control), related to Figure 2

Figure S1S. HPLC-MS analysis of extraction products from large scale culture (800 ml), related to Figure 2

Figure S2A. Proton NMR (600 MHz) spectrum of compound 4 in CD<sub>3</sub>OD, related to Figure 2

Figure S2B. Carbon NMR (600 MHz) spectrum of compound 4 in CD<sub>3</sub>OD, related to Figure 2

Figure S2C. Proton NMR (600 MHz) spectrum of compound 5 in CDCl<sub>3</sub>, related to Figure 2

Figure S2D. Carbon NMR (600 MHz) spectrum of compound 5 in CDCl<sub>3</sub>, related to Figure 2

Supplemental Experimental Procedures

## Supplemental Tables and Figures

**Table S1, related to Plasmid Construction. Primers used in this study**

| Primer name          | Sequence(5'-3')                                                   | Remarks                      |
|----------------------|-------------------------------------------------------------------|------------------------------|
| ATEG_03629-F         | aaagaaagcatagcaatctaagttttaattacaaaatgact<br>ccaacctgctgct        | Exon1 fragment               |
| ATEG_03629-exon1-R:  | gtgtcgccgatgccacatcgaccgcacagataaatgcacc<br>attgtatgtctccaaga     |                              |
| ATEG_03629-exon2-F:  | tgaacgaaaagtc aaagatatcttgagacatacaatggtgcat<br>atttatctgtgcggtc  | Exon2 fragment1*             |
| ATEG_03629-exon2-M-R | cgctaaggagagaagctctgc                                             | Exon2 fragment2*             |
| ATEG_03629-exon2-M-F | gcaagtcgactactggccgt                                              |                              |
| ATEG_03629-exon2-R   | cgagagagcatgatgtggcctccgccatggatcatgagcgcaa<br>tggggcgcttgacgcct  |                              |
| ATEG_03629-exon3-F:  | cctacgaagcccgcacgcaccagcgctcaagcgccccattgcg<br>ctcatgatccatggcgga | Exon3 fragment               |
| ATEG_03629-R         | aattagagcgtgatcatgaattaataaaagtgttcgcaactaaa<br>ggtgcctcaacaaa    |                              |
| ATEG_03630-F         | tttttagtttaaacaccagaacttagtttcgacggatatgtcgc<br>ccatcgccatcga     | Exon1 fragment               |
| ATEG_03630-exon1-R   | caactgtcatggcgagacatgggtgcaccaaccggaatccgtg<br>aaataacggtagagcag  | Exon2 fragment               |
| ATEG_03630-exon2-F   | cgcgctcggaactgtactctgtctaccgttatttcacggattc<br>gggttggtcgacc      |                              |
| ATEG_03630-exon2-R   | gcacagtagccgcatgtcaacagcgatccaggagagagtctg<br>tttaatagctggcagtt   |                              |
| ATEG_03630-exon3-F   | gtttgcaagcatggttggtcaactgccagctattaacagactct<br>ctcctggatcgctgt   | Exon3 fragment               |
| ATEG_03630-R         | ttcaaaaaataatatcttcattcaatcatgattctttttcattctagt<br>ggtgccctca    |                              |
| GPM1p-F              | attgggtaccgggccccctcgaggtcgacggatcattagtg<br>cgtgcaatgtatgact     | GPM1p promoter<br>fragment   |
| GPM1p-R              | aaattggcgaaagtgccttgcgcttgatgtgtcttgaccattattgta<br>atatgtgtgtttg |                              |
| npgA-F               | attcttctaataatccaacaacacacatatataaataatggtgc<br>aagacacatcaag     | npgA fragment                |
| npgA-R               | ggagggaaaaagaaatcatcaaatcattcattcttcagacttagg<br>ataggcaattacaca  |                              |
| GPM1t-F              | ccagccctgtgcgactggggtgtgaattgcctatcctaagtctg<br>aagaatgaatgattt   | GPM1t terminator<br>fragment |
| GPM1t-R              | tagaactagtggtatccccgggctgcaggaattcgatatctattc<br>gaactgccattcag   |                              |
| long homology-F      | cgagtgccgtaagcacta                                                | ATEG_03630<br>fragment       |
| PYKt-R               | catttatgtacccatgtata                                              |                              |
| PYKt-F               | aatcatgattgaatgaagat                                              | ATEG_03629<br>fragment 1*    |
| 03629-mid-R          | ttgcaacttttacttgta                                                |                              |
| 03630-mid-F          | gctagtctactcgttccgga                                              | ATEG_03629<br>fragment 2*    |
| long homology-R      | ggaagcggaagagcgcccaa                                              |                              |
| 03629-S1651A-R       | tttctgatggcgcttagaagctctgctgcatgagGGCatca<br>atgcccaagtctcca**    | S1651A                       |
| 03629-S1651A-F       | cagcagagcttctaagcgcc                                              |                              |
| 03629-S1772A-R       | gttgatatctgcagcaattccatgccaaacaaCGCgtcca<br>gaccgatatcacggagtg    | S1772A                       |
| 03629-S1772A-F       | ttggcatggaattggctgca                                              |                              |
| 03630-S611A-R        | aagaaagtagaagtcgatgcaggcggattgcctgcagAGCa<br>ttcataccgagttcaaca   | S611A                        |
| 03630-S611A-F        | caatccgctgcatcgactt                                               |                              |

|                        |                                                         |       |
|------------------------|---------------------------------------------------------|-------|
| ADH2p-ateg-03630-his-F | atcaactattaactatatacgtaataccatcatgggcagcagccat<br>catca |       |
| ADH2p-ateg-03630-his-R | ataatgaaaactataaatcgtgaaggcatgtcattctagtgggtgc<br>cctca |       |
| ateg-03630-Y863F-F     | cattgaagactttggaTTCgggaaggccaagtatgtatgc                | Y863F |
| ateg-03630-Y863F-R     | gcatacataactggccttcccGAAatccaaagtcttcaatg               |       |
| ateg-03630-K867A-F     | tttgatacgggaaggccGCGtatgtatgcgaagagatta                 | K867A |
| ateg-03630-K867A-R     | taatctcttcgcatacataCGCggccttcccgtatccaaa                |       |
| ateg-03630-T690A-F     | atgccacagttctcttgGCTggtagcacaggcaatctcgg                | T690A |
| ateg-03630-T690A-R     | ccgagattgcctgtgctaccAGCcaagagaactgtggcat                |       |
| qPCR-A.terreus-actin-F | gatctggcatcacacgttct                                    |       |
| qPCR-A.terreus-actin-R | catcttctcacgggttgactt                                   |       |
| 03628-qPCR-F           | gcaagcaacccagtacagcgaat                                 |       |
| 03628-qPCR-R           | ttacctgtccgtggcatctccatt                                |       |
| 03629-qPCR-F           | acgggagctcgtgaatgacatctt                                |       |
| 03629-qPCR-R           | caaaccgcaatccaaacagggtca                                |       |
| 03630-qPCR-F           | aaagcctgttcccagggtccgataa                               |       |
| 03630-qPCR-R           | actggagattcaatgcggtcgtct                                |       |
| 03631-qPCR-F           | tcaactcgcctacgctcaatccga                                |       |
| 03631-qPCR-R           | tgcgctttgaagctcaataccac                                 |       |
| 03632-qPCR-F           | aatgtcaaagggccgatgttcctc                                |       |
| 03632-qPCR-R           | agcactcgggtcatttgctcgata                                |       |
| 03635-qPCR-F           | aatgggctcgggctaactcatctt                                |       |
| 03635-qPCR-R           | aaactaattccctggcgggtagt                                 |       |

\* The long PKS gene was broken into two fragments for ready amplification by PCR.

\*\* Upper-case letters are mutated codons.

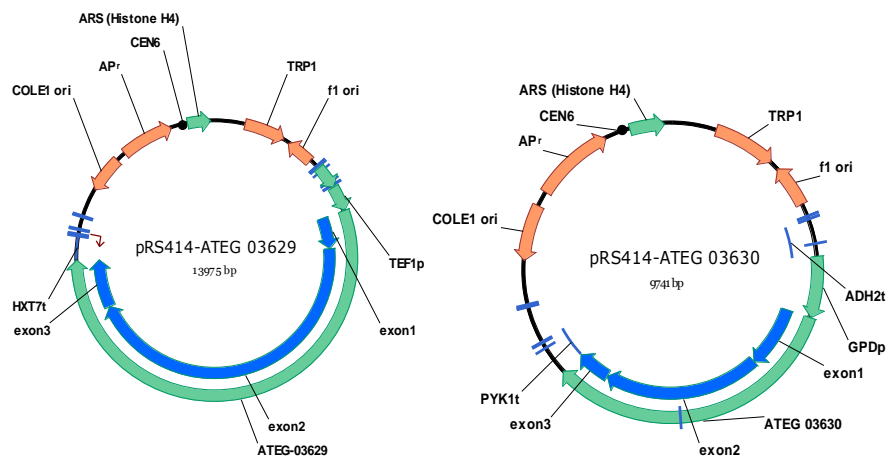

**Figure S1A, related to Plasmid Construction.** Maps of the plasmids carrying the NR-PKS or NRPS-like gene.

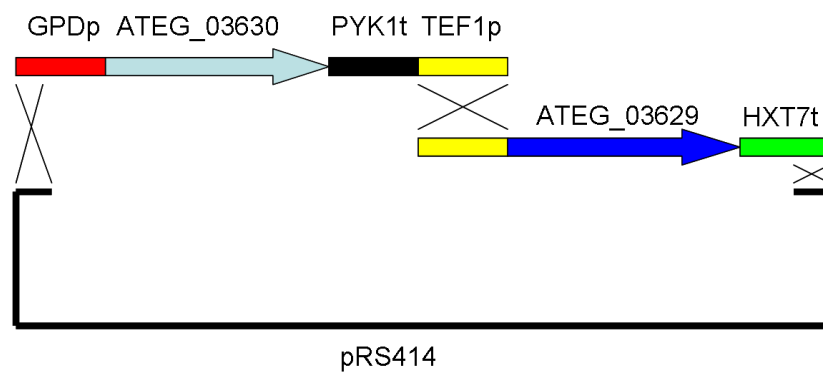

**Figure S1B, related to Plasmid Construction.** Strategy for assembling the two-gene ATEG\_03629\_03630 cassette.

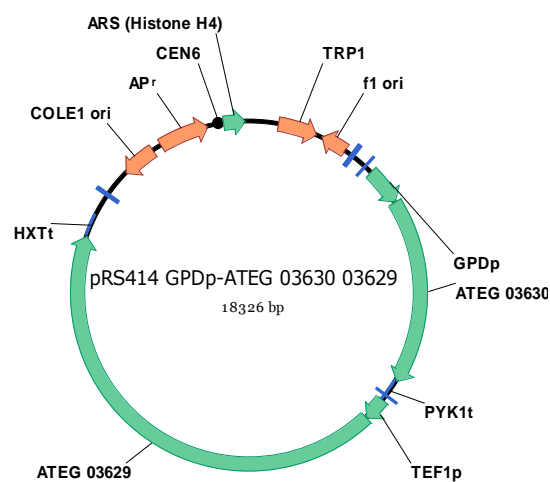

**Figure S1C, related to Plasmid Construction.** Map of the plasmid carrying the two-gene cassette consisting of the NR-PKS and NRPS-like genes.

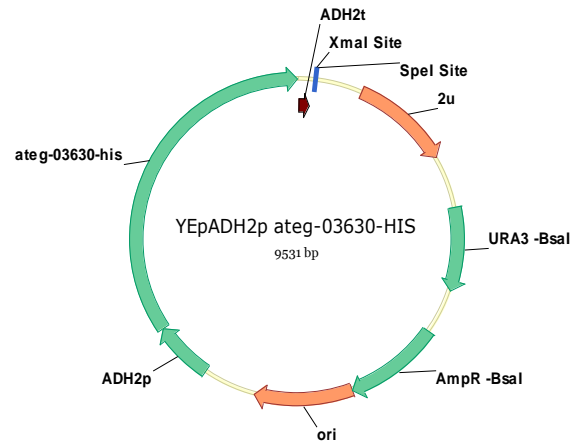

**Figure S1D, related to Plasmid Construction.** Map of the plasmid for over-expressing NRPS-like protein ATEG\_03630.

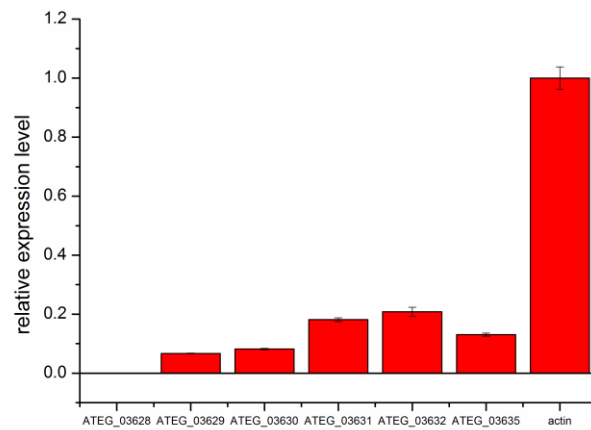

**Figure S1E, related to Quantitative PCR Analysis.** Quantitative PCR analysis of the expression level of the target gene cluster in the native host *A. terreus*. Data are represented as mean  $\pm$  SD.

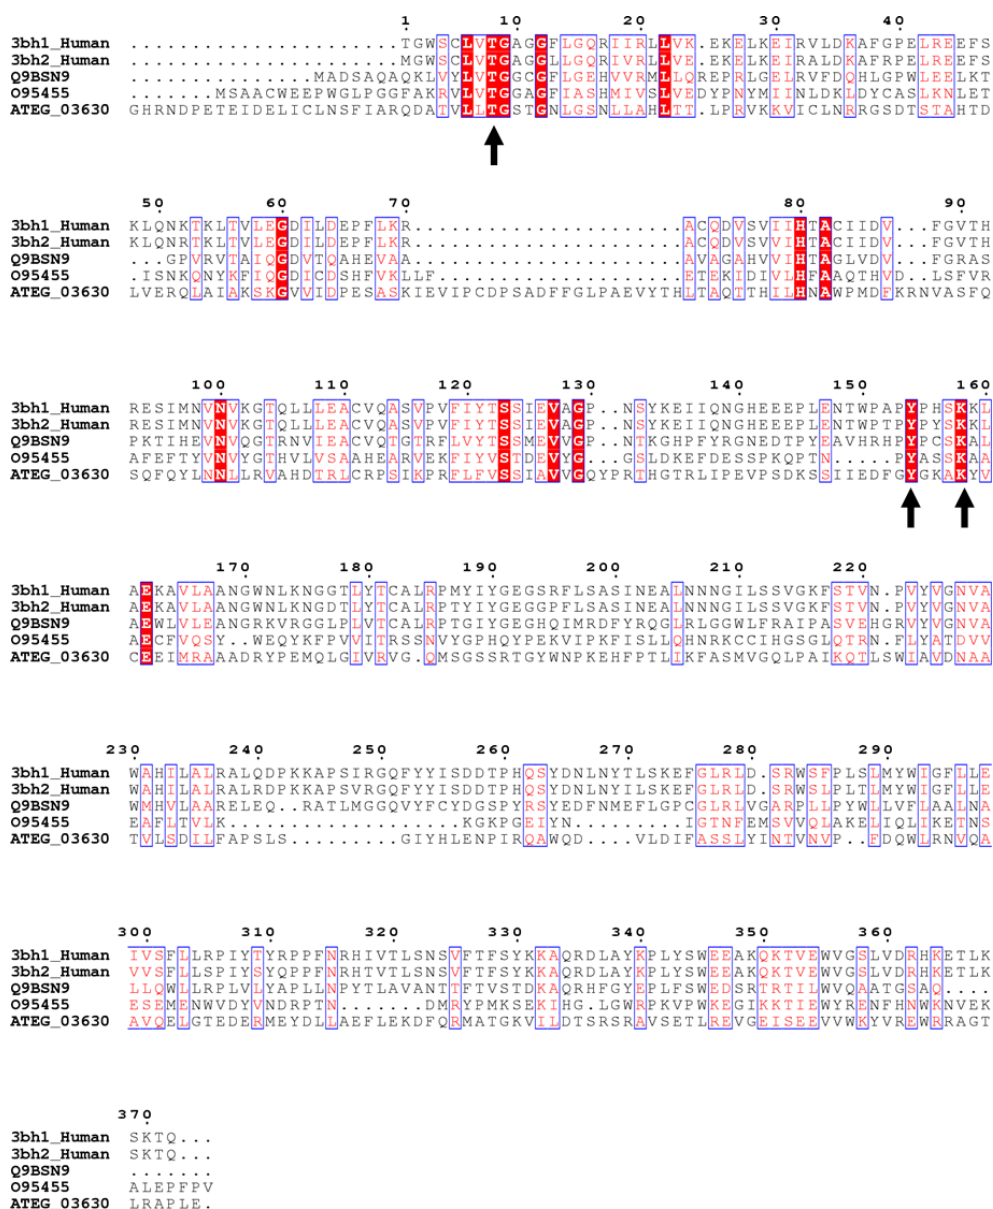

**Figure S1F, related to Figure 2.** Multiple sequence alignment of R domain of ATEG\_03630 with different short-chain dehydrogenases/reductases family proteins. Black arrow: mutated residues in this study. Abbreviation are as follows: 3bh1\_Human: 3 beta-hydroxysteroid dehydrogenase type 1, 3bh2\_Human: 3 beta-hydroxysteroid dehydrogenase type 2, O95455: dTDP-D-glucose 4,6-dehydratase, Q9BSN9: 3 beta-hydroxy-delta 5-c27-steroid oxidoreductase.

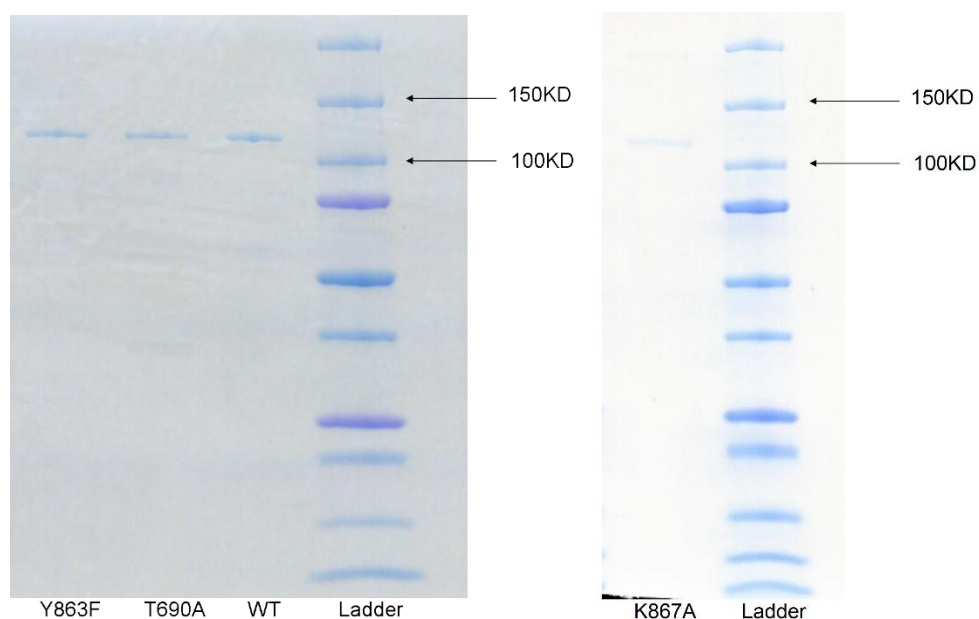

**Figure S1G, related to Figure 2.** SDS-PAGE analysis of purified ATEG\_03630 WT and mutant proteins.

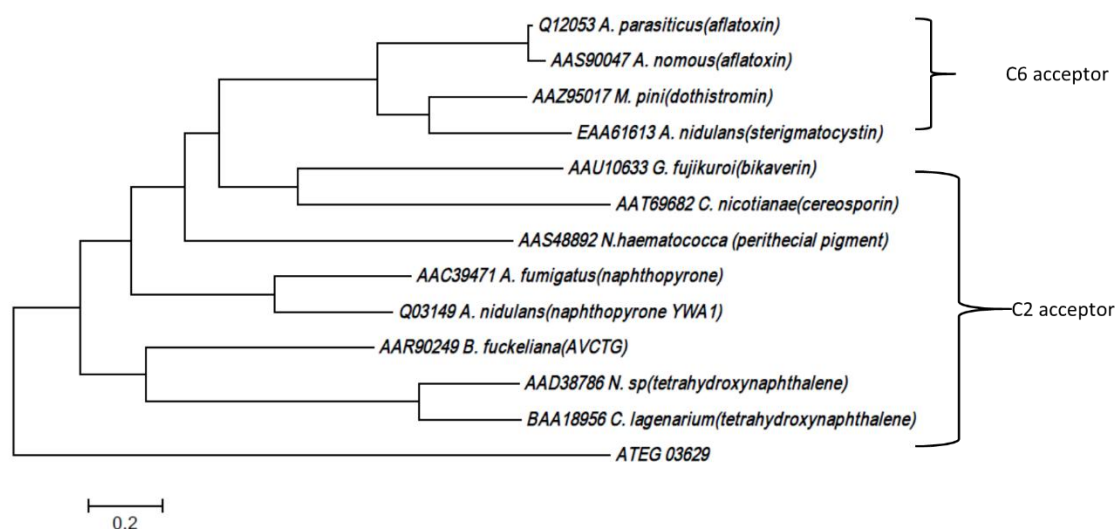

**Figure S1H, related to Figure 2.** Phylogenetic analysis of the SAT domains of homologous NR-PKSs. Starter unit of ATEG\_03629 is more likely to be acetyl-CoA than other long chain CoA.

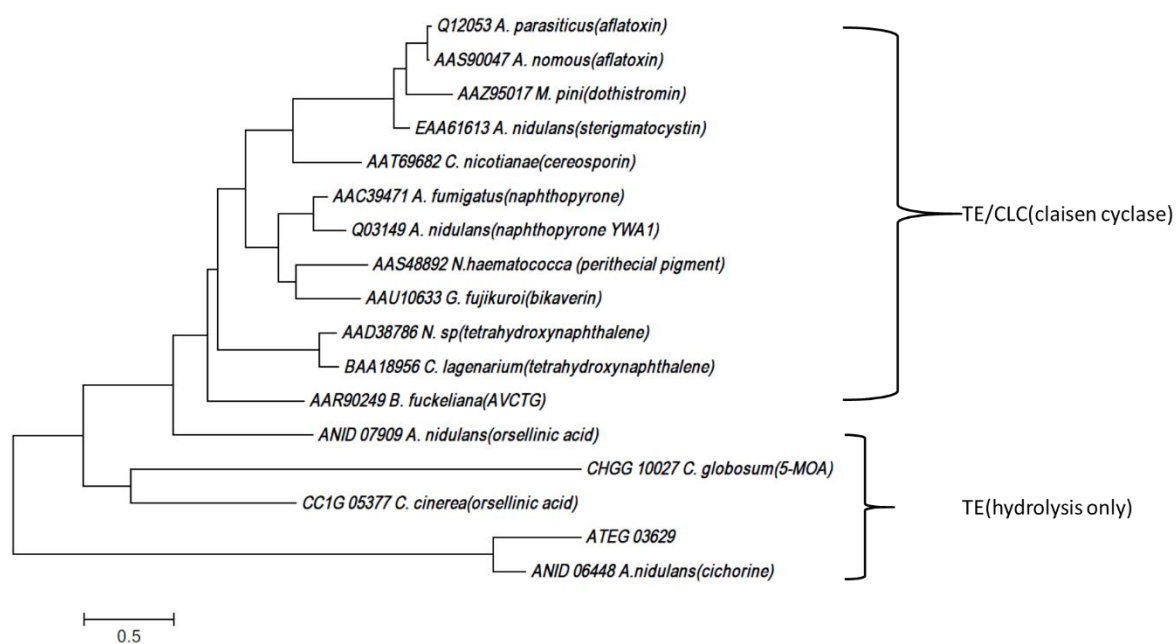

**Figure S1I, related to Figure 2.** Phylogenetic analysis of the TE domains of homologous NR-PKSs. The TE domain of ATEG\_03629 is more likely to perform only hydrolysis reaction than claisen condensation.

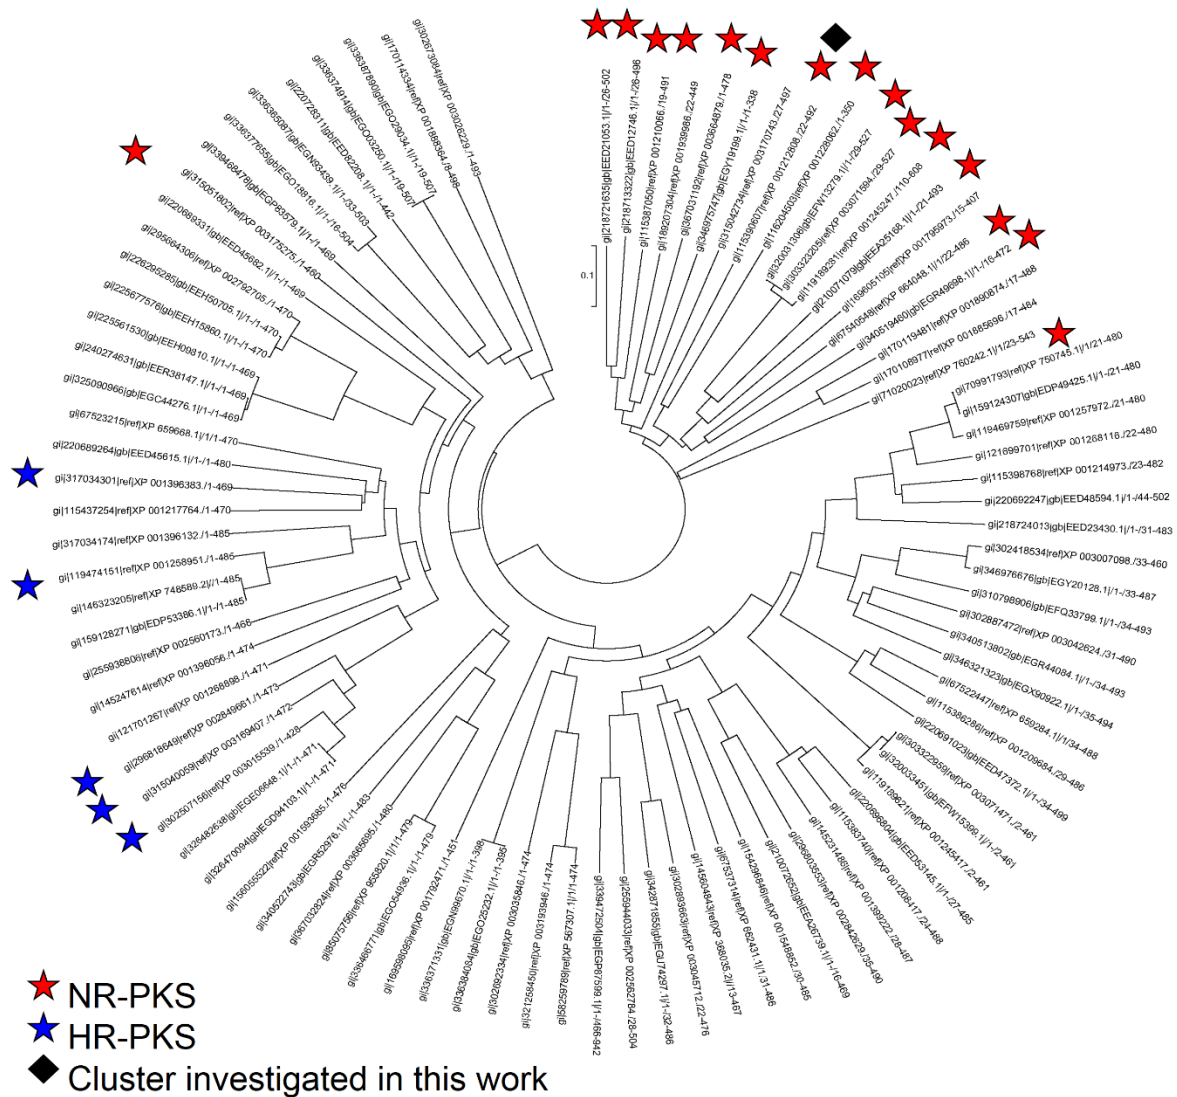

**Figure S1J, related to Figure 2.** Phylogenetic analysis of the A domain of homologous NRPS-like genes. Red star: NRPS-like gene with a NR-PKS in its vicinity. Blue star: NRPS-like gene with a HR-PKS in its vicinity.

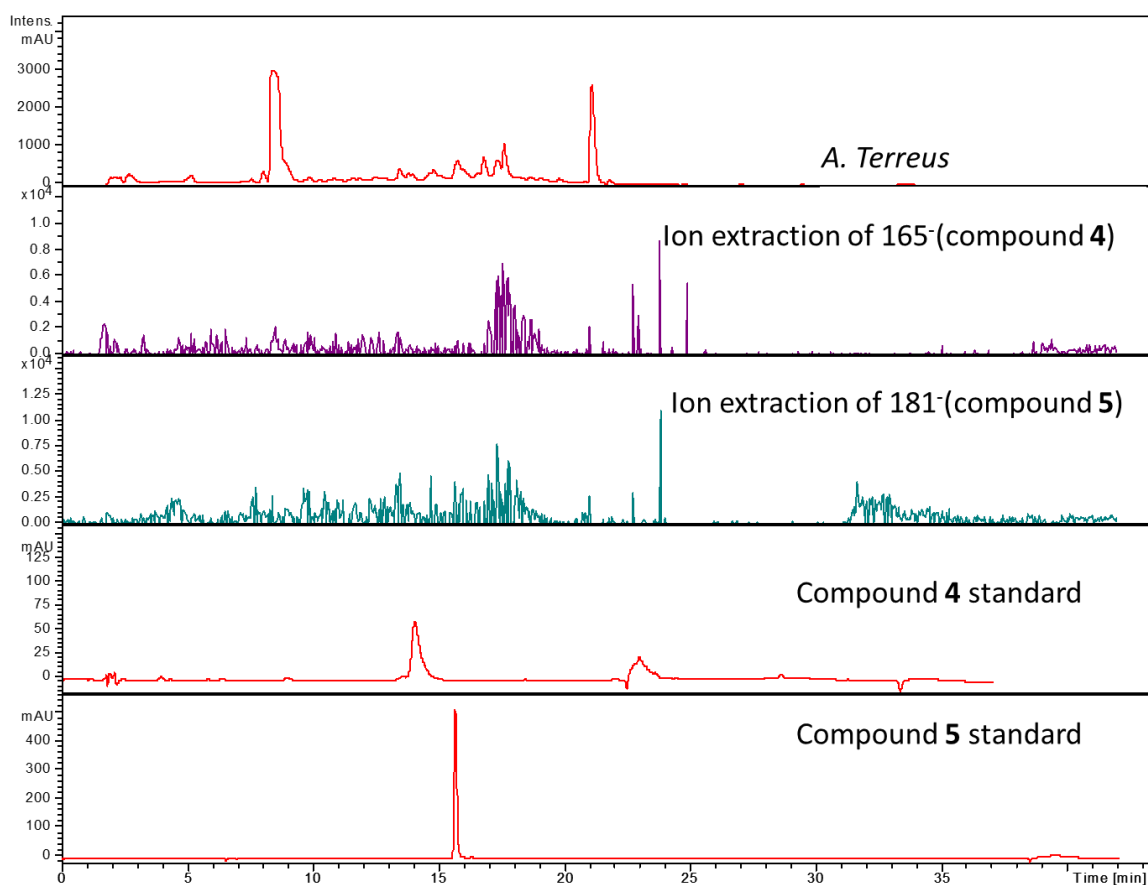

**Figure S1K, related to Figure 2.** HPLC-MS analysis of culture extraction of native host *A. terreus*.

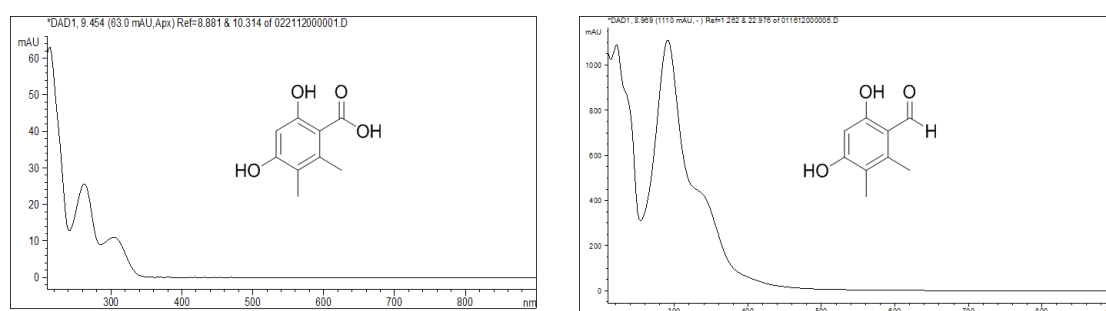

**Figure S1L, related to Figure 2.** UV-Vis spectra of compounds 4 and 5.

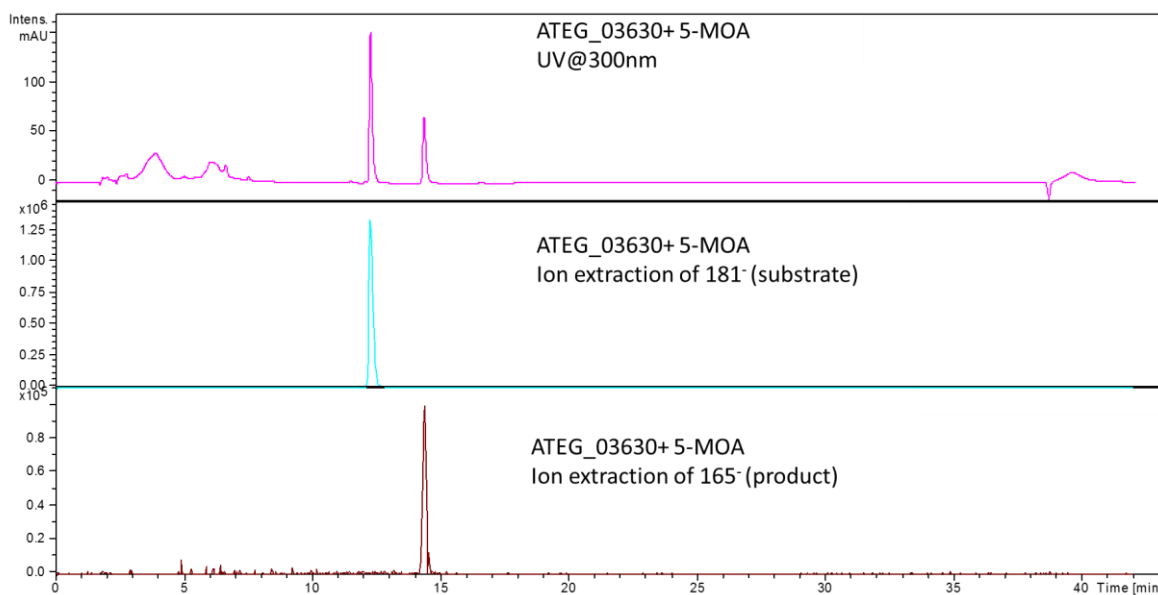

**Figure S1M, related to *In vitro* Characterization of ATEG\_03630 and its Mutants.** HPLC-MS analysis of *in vitro* assay of NRPS-like protein ATEG\_03630 catalyzed reduction of 5-MOA after 15min incubation. Compound **5** can be detected.

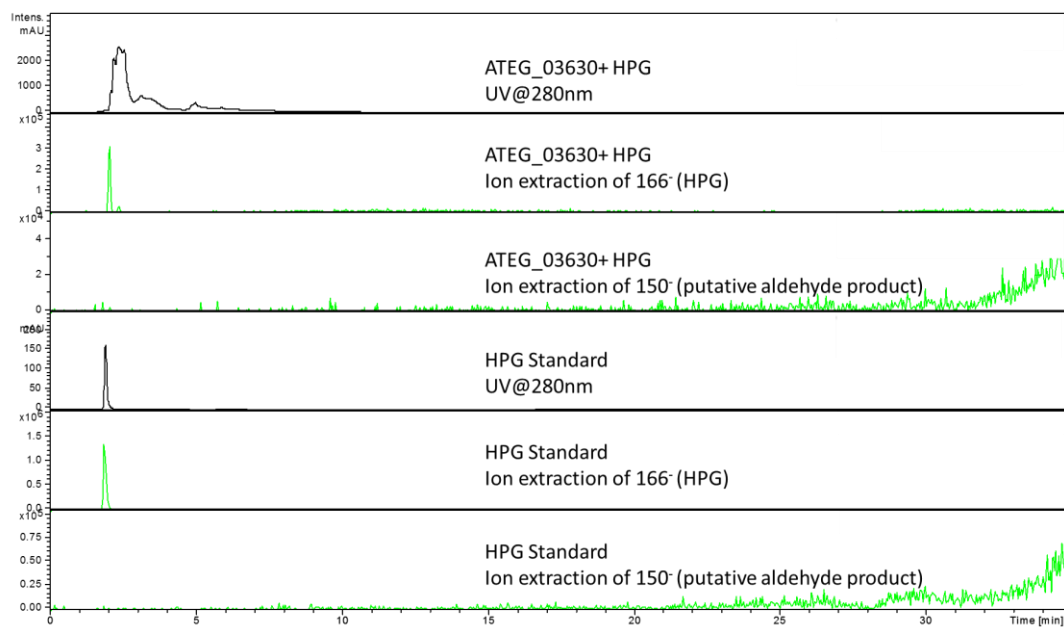

**Figure S1N, related to *In vitro* Characterization of ATEG\_03630 and its Mutants.** HPLC-MS analysis of *in vitro* assay of NRPS-like protein ATEG\_03630 catalyzed reduction of HPG. No aldehyde product can be detected.

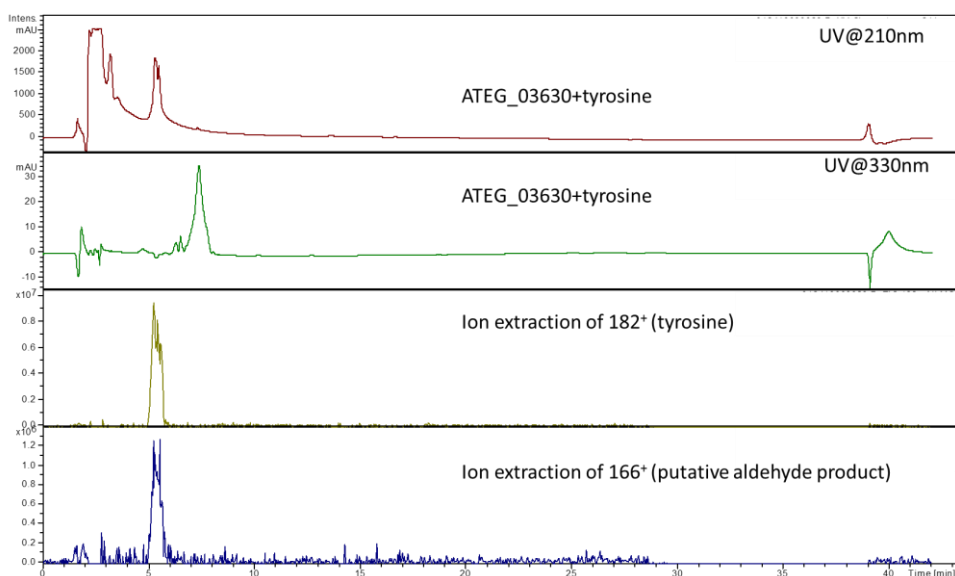

**Figure S1O, related to *In vitro* Characterization of ATEG\_03630 and its Mutants.** HPLC-MS analysis of *in vitro* assay of NRPS-like protein ATEG\_03630 catalyzed reduction of tyrosine. No aldehyde product can be detected.

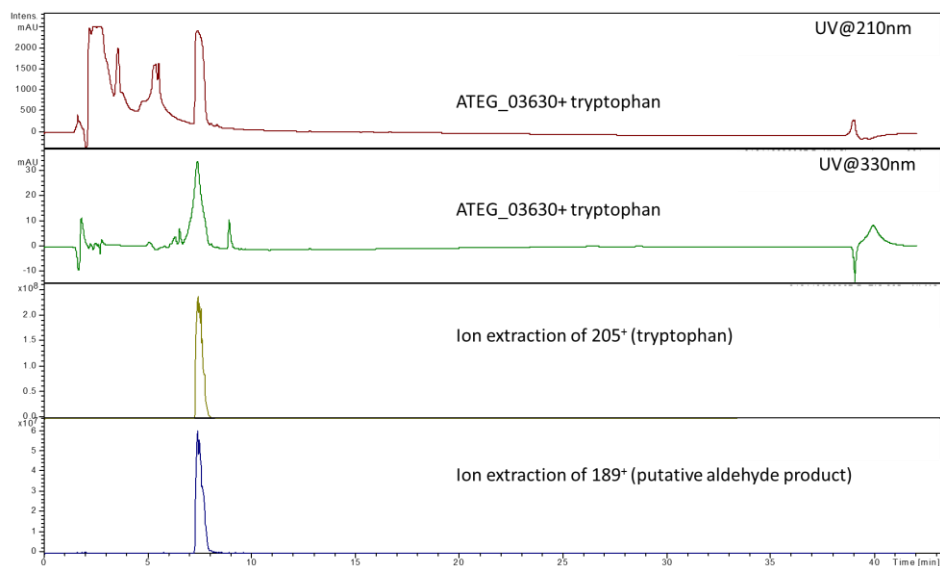

**Figure S1P, related to *In vitro* Characterization of ATEG\_03630 and its Mutants.** HPLC-MS analysis of *in vitro* assay of NRPS-like protein ATEG\_03630 catalyzed reduction of tryptophan. No aldehyde product can be detected.

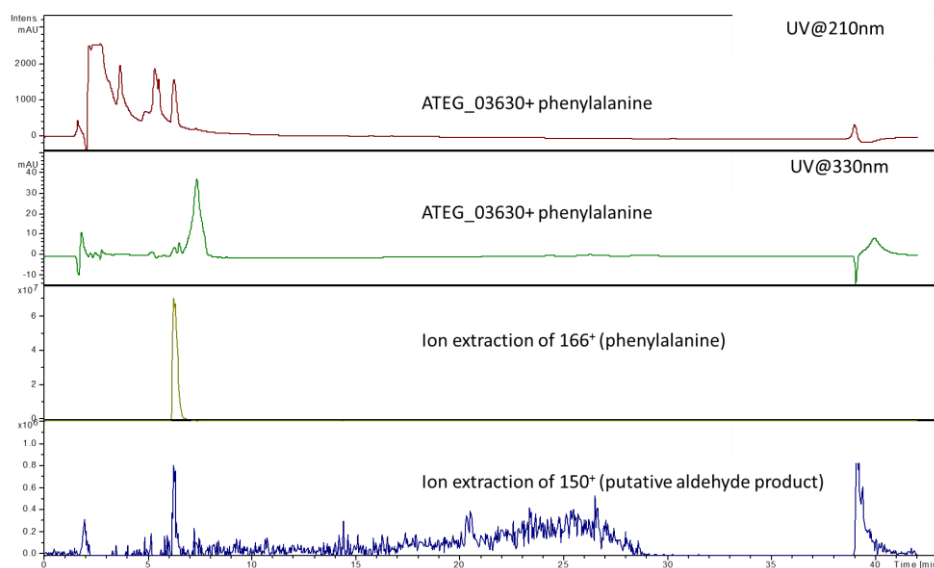

**Figure S1Q, related to *In vitro* Characterization of ATEG\_03630 and its Mutants.** HPLC-MS analysis of *in vitro* assay of NRPS-like protein ATEG\_03630 catalyzed reduction of phenylalanine. No aldehyde product can be detected.

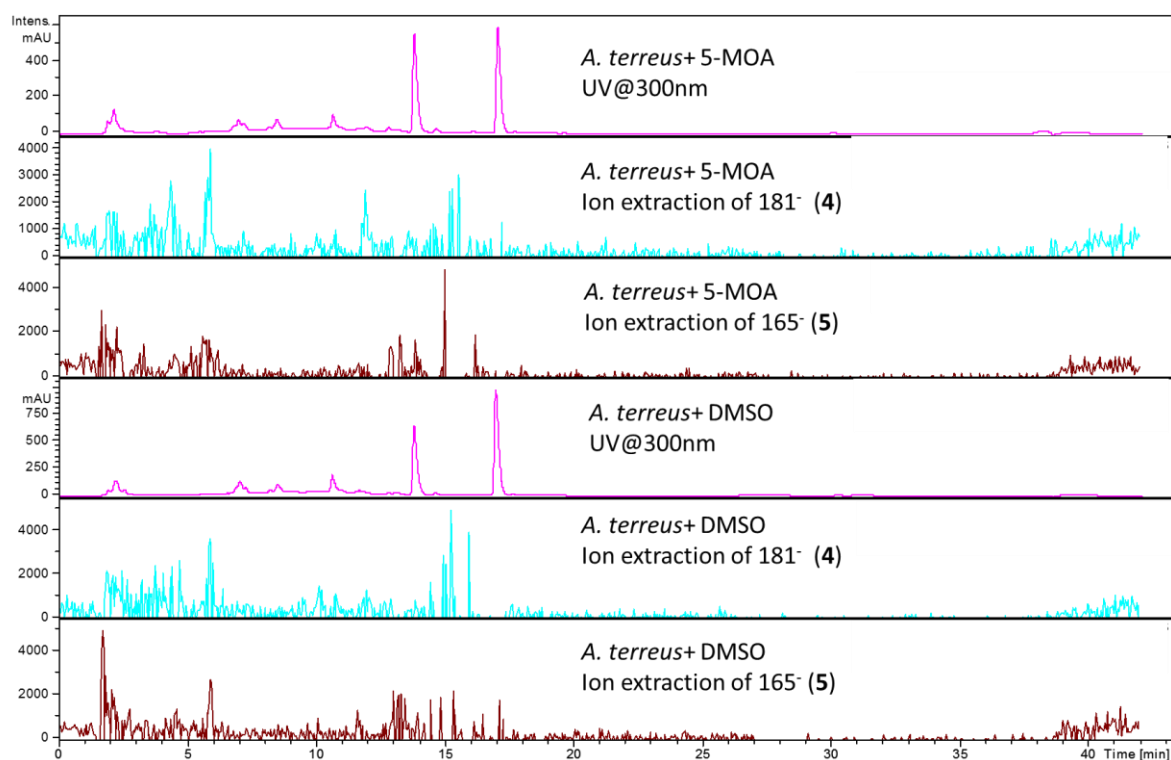

**Figure S1R, related to Figure 2.** HPLC-MS analysis of culture extraction of native host *A. terreus* fed with 5-MOA or DMSO (control).

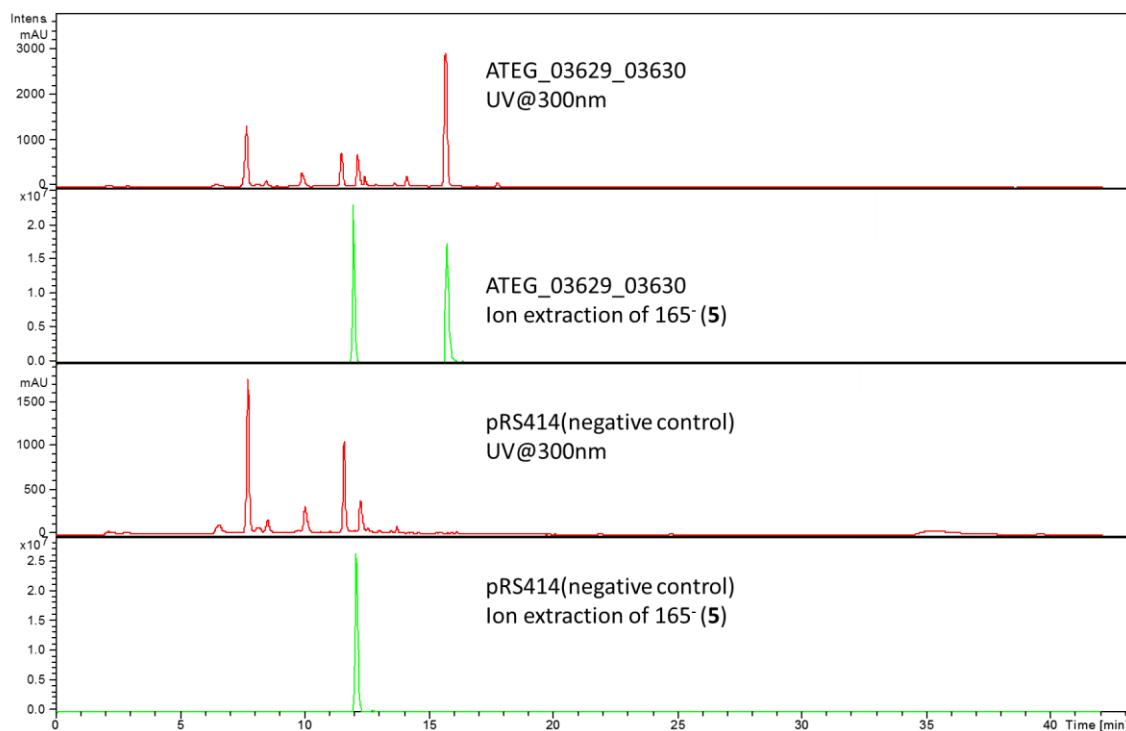

**Figure S1S, related to Figure 2.** HPLC-MS analysis of extraction product from large scale culture (800 ml).

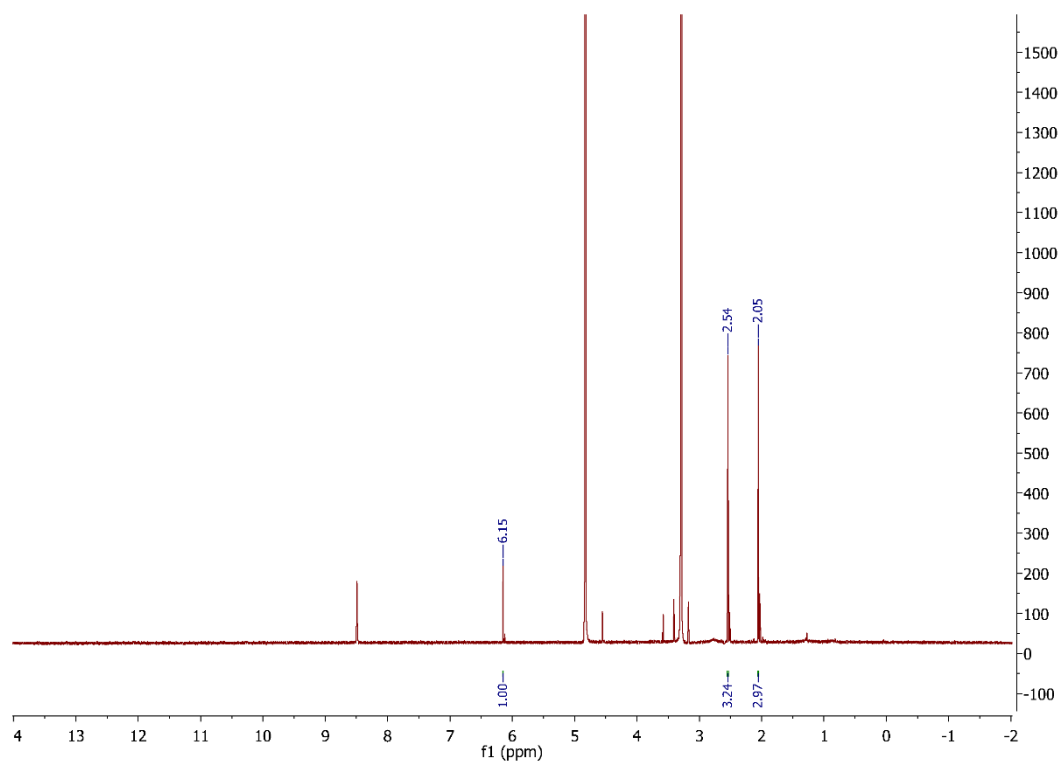

**Figure S2A, related to Figure 2.** Proton NMR (600 MHz) spectrum of compound 4 in CD<sub>3</sub>OD.

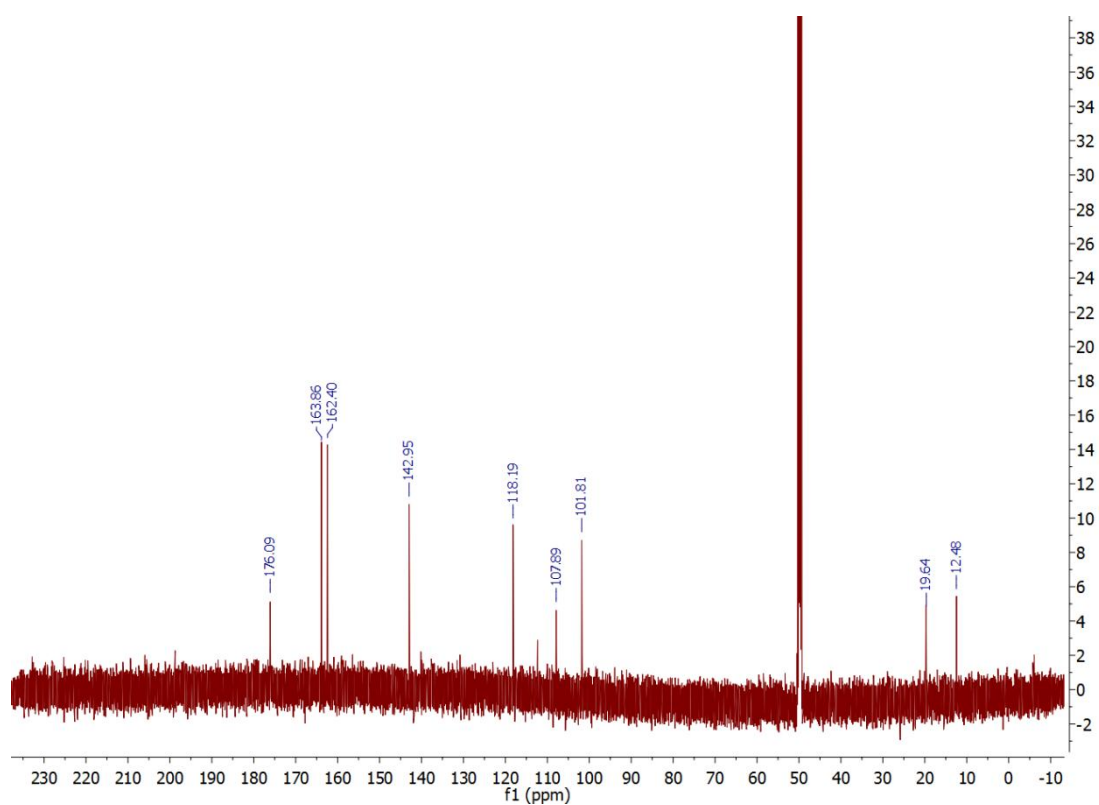

**Figure S2B, related to Figure 2.** Carbon NMR (600 MHz) spectrum of compound **4** in CD<sub>3</sub>OD.

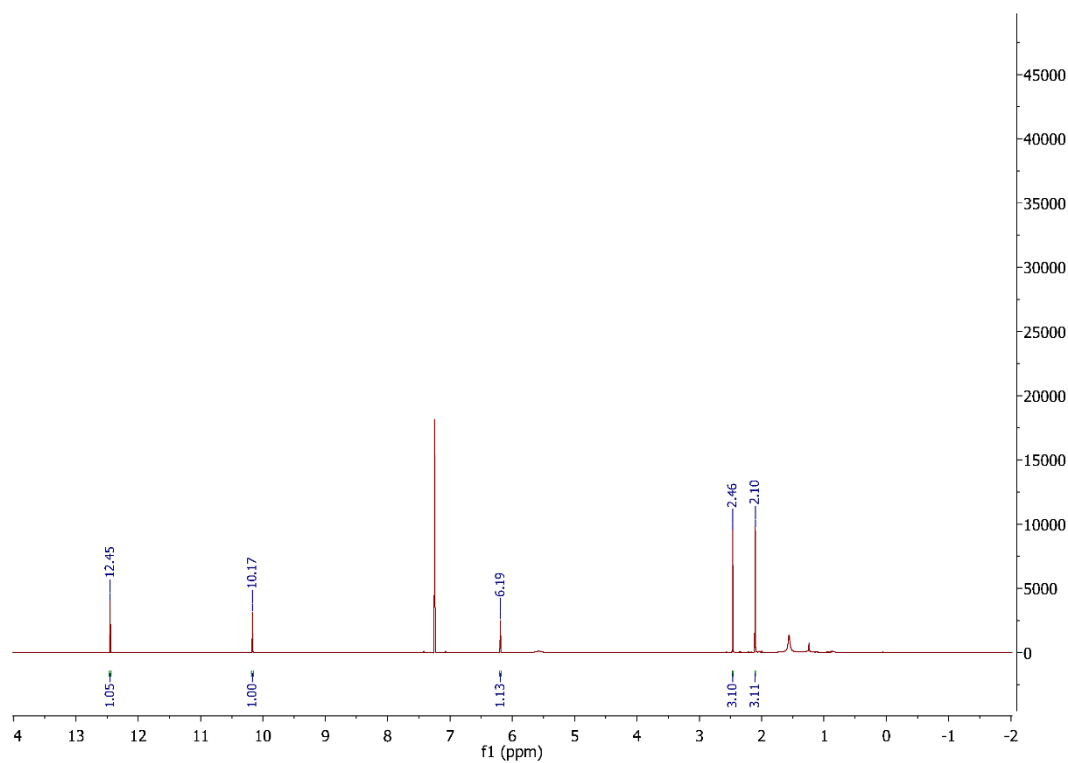

**Figure S2C, related to Figure 2.** Proton NMR (600 MHz) spectrum of compound **5** in CDCl<sub>3</sub>.

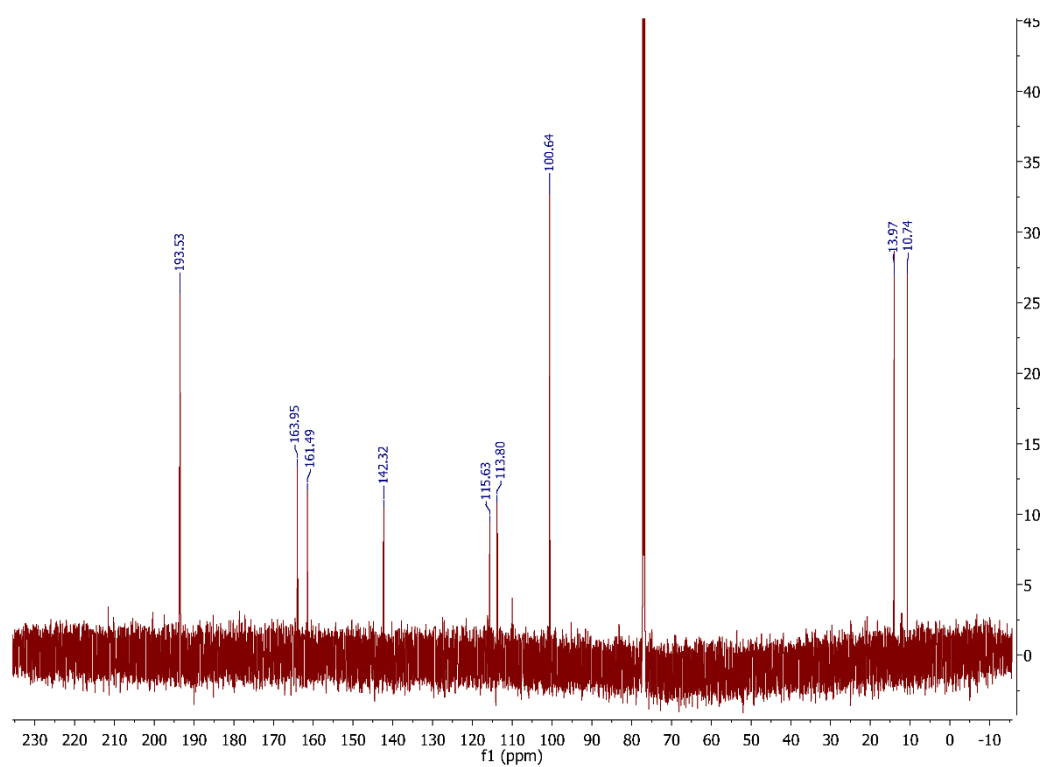

**Figure S2D, related to Figure 2.** Carbon NMR (600 MHz) spectrum of compound **5** in CDCl<sub>3</sub>.

## Supplemental Experimental Procedures

### I. Molecular Biology

#### 1. Plasmid Construction

**Cloning of *ATEG\_03629*.** PCR was used to amplify each of the three exons that in combination encode the *ATEG\_03629* gene from the genomic DNA of *A. terreus* using the corresponding primers listed in Table S1. Helper plasmid pRS414-TEF1p-HXT7t was linearized by *XhoI* digestion. The full *ATEG\_03629* gene under the control of the TEF1p promoter was assembled via the DNA assembler method<sup>[1]</sup> to obtain the plasmid pRS414-*ATEG\_03629*.

**Cloning of *ATEG\_03630*.** PCR was used to amplify each of the three exons that in combination encode the *ATEG\_03630* gene from the genomic DNA of *A. terreus* using the corresponding primers listed in Table S1. Helper plasmid pRS414-GPDp-PYK1t was linearized by *XhoI* digestion. The full *ATEG\_03630* gene under the control of the GPDp promoter was assembled via the DNA assembler method to obtain plasmid pRS414-*ATEG\_03630*.

**Cloning of *npgA*.** PCR was used to amplify to the *npgA* gene from the genomic DNA of *A. nidullans* using the corresponding primers listed in Table S1. DNA fragments encoding the promoter GPM1p and the terminator GPM1t were amplified from plasmid pRS414-GPM1p-GPM1t. Plasmid pRS416 was linearized by *HindIII* digestion. The full *npgA* gene under the control the GPM1p promoter was assembled via the DNA assembler method to obtain plasmid pRS416-GPM1p-*npgA*-GPM1t.

**Construction of plasmid pRS414-*ATEG\_03629\_03630*.** Backbone fragment was obtained by restriction digestion of plasmid pRS414 with *BamHI* and *EcoRI*. DNA fragment containing the *ATEG\_03629* gene was PCR-amplified from the plasmid pRS414-*ATEG\_03629* using the corresponding primers listed in Table S1. DNA fragment containing the *ATEG\_03630* gene was PCR-amplified from the plasmid pRS414-*ATEG\_03630* using the primers listed in Table S1. The plasmid pRS414-*ATEG\_03629\_03630* was constructed via DNA assembler as shown in Figure S1A.

**Construction of plasmid pRS414-*ATEG\_03629m-S1651A-S1772A*.** DNA fragments encoding double mutant *ATEG\_03629m-S1651A-S1772A* were PCR-amplified from plasmid pRS414-*ATEG\_03629* using the corresponding primers listed in Table S1. Helper plasmid pRS414-TEF1p-HXT7t was linearized by *XhoI* digestion. The plasmid pRS414-*ATEG\_03629m-S1651A-S1772A* was constructed via DNA assembler.

**Construction of plasmid pRS414-*ATEG\_03630m-S611A*.** DNA fragments encoding the mutant *ATEG\_03630m-S611A* gene were PCR-amplified from plasmid pRS414-*ATEG\_03630* using the corresponding primers listed in Table S1. Helper plasmid pRS414-GPDp-PYK1t was linearized by *XhoI* digestion. The plasmid pRS414-*ATEG\_03630m-S611A* was constructed via DNA assembler.

**Construction of plasmid pRS414-*ATEG\_03629m-S1651A*.** DNA fragments encoding the mutant *ATEG\_03629m-S1651A* were PCR-amplified from plasmid pRS414-*ATEG\_03629* using the corresponding primers listed in Table S1. Helper plasmid pRS414-TEF1p-HXT7t was linearized by *XhoI* digestion. The plasmid pRS414-*ATEG\_03629m-S1651A* was constructed via DNA assembler.

**Construction of plasmid pRS414-*ATEG\_03629m-S1772A*.** DNA fragments encoding the mutant *ATEG\_03629m-S1772A* were PCR-amplified from plasmid pRS414-*ATEG\_03629* using the corresponding primers listed in Table S1. Helper plasmid pRS414-TEF1p-HXT7t was linearized by *XhoI* digestion. The plasmid pRS414-*ATEG\_03629m-S1772A* was constructed via DNA assembler.

**Construction of plasmid pRS414-*ATEG\_03629m-S1651A-S1772A\_03630*.** The vector backbone fragment was obtained by restriction digestion of plasmid pRS414 with *BamHI* and *EcoRI*. DNA fragment containing the *ATEG\_03629m-S1651A-S1772A* gene was PCR-amplified from the plasmid pRS414-*ATEG\_03629m-S1651A-S1772A* using the corresponding primers listed in Table S1. DNA fragment containing the mutant *ATEG\_03630* gene was PCR-amplified from the plasmid pRS414-*ATEG\_03630* using the primers listed in Table S1. The plasmid pRS414-*ATEG\_03629m-S1651A-S1772A\_03630* was constructed via DNA assembler.

**Construction of plasmid pRS414-*ATEG\_03629\_03630m-S611A*.** Backbone fragment was obtained by restriction digestion of plasmid pRS414 with *BamHI* and *EcoRI*. DNA fragment containing the *ATEG\_03629* gene was PCR-amplified from the plasmid pRS414-*ATEG\_03629* using the corresponding primers listed in

Table S1. DNA fragment containing the mutant ATEG\_03630m-S611A gene was PCR-amplified from the plasmid pRS414-ATEG\_03630m-S611A using the primers listed in Table S1. The plasmid pRS414-ATEG\_03629\_03630m-S611A was constructed via DNA assembler.

**Construction of plasmid YEp-ADH2p-ATEG\_03630-HIS.** Backbone fragment was obtained by restriction digestion of plasmid YEp-ADH2p with *BsaI*. DNA fragment containing the ATEG\_03630 gene with 6×His-tag was PCR-amplified from the plasmid pRS414-ATEG\_03630 using the corresponding primers listed in Table S1. The plasmid YEp-ADH2p-ATEG\_03630-HIS was constructed via DNA assembler.

**Construction of plasmid YEp-ADH2p-ATEG\_03630-HIS.** Backbone fragment was obtained by restriction digestion of plasmid YEp-ADH2p with *BsaI*. DNA fragment containing the ATEG\_03630 mutant with 6×His-tag was PCR-amplified from the plasmid pRS414-ATEG\_03630 using the corresponding primers listed in Table S1. The plasmid YEp-ADH2p-ATEG\_03630-HIS was constructed via DNA assembler.

**Construction of plasmid YEp-ADH2p-ATEG\_03630-HIS-T690A.** Backbone fragment was obtained by restriction digestion of plasmid YEp-ADH2p with *BsaI*. DNA fragment containing the ATEG\_03630 mutant with 6×His-tag was PCR-amplified from the plasmid YEp-ADH2p-ATEG\_03630-HIS using the corresponding primers listed in Table S1. The plasmid YEp-ADH2p-ATEG\_03630-HIS-T690A was constructed via DNA assembler.

**Construction of plasmid YEp-ADH2p-ATEG\_03630-HIS-Y863F.** Backbone fragment was obtained by restriction digestion of plasmid YEp-ADH2p with *BsaI*. DNA fragment containing the ATEG\_03630 mutant with 6×His-tag was PCR-amplified from the plasmid YEp-ADH2p-ATEG\_03630-HIS using the corresponding primers listed in Table S1. The plasmid YEp-ADH2p-ATEG\_03630-HIS-Y863F was constructed via DNA assembler.

**Construction of plasmid YEp-ADH2p-ATEG\_03630-HIS-K867A.** Backbone fragment was obtained by restriction digestion of plasmid YEp-ADH2p with *BsaI*. DNA fragment containing the ATEG\_03630 mutant with 6×His-tag was PCR-amplified from the plasmid YEp-ADH2p-ATEG\_03630-HIS using the corresponding primers listed in Table S1. The plasmid YEp-ADH2p-ATEG\_03630-HIS-K867A was constructed via DNA assembler.

## 2. Restriction Digestion Analysis and Mutant Confirmation

Colonies were randomly picked and grown in drop-out liquid media for two days, after which the plasmids from yeast were isolated using Zymoprep II Yeast Plasmid Miniprep kit (Zymo Research, CA). Yeast plasmids were transformed to *E. coli* strain BW25141 and selected on Luria Broth (LB) agar plates supplemented with 50 µg/mL ampicillin. Colonies were inoculated into 5 mL of LB media supplemented with 50 µg/mL ampicillin, and plasmids were isolated from the liquid culture using the plasmid miniprep kit from Qiagen (Valencia, CA). Plasmids isolated from *E. coli* were then subjected to restriction digestion. Usually, one or two enzymes cutting the target molecule at multiple sites were chosen. The reaction mixtures were loaded to 0.7% agarose gels to check for the correct restriction digestion pattern by DNA electrophoresis. The site-directed mutations in the ATEG\_03629m-S1651A-S1772A double mutant, ATEG\_03630m-S611A, ATEG\_03629m-S1651A, ATEG\_03629m-S1772A, YEp-ADH2p-ATEG\_03630-HIS-T690A, YEp-ADH2p-ATEG\_03630-HIS-Y863F and YEp-ADH2p-ATEG\_03630-HIS-K867A were confirmed by DNA sequencing.

## II. Compound Purification and Characterization

### 1. Purification and characterization of compound 4

The yeast transformant producing compound **4** was grown in 1.6 L SC-TRP-URA dropout media for 5 days. Cell pellets were collected by centrifugation. The supernatants were extracted with 2 volume of ethyl acetate and cell pellets were extracted with acetone. The organic fractions of both extractions were combined and evaporated to dryness. It was re-dissolved in 1 mL of methanol. Compound **4** was then purified by semi-preparative HPLC purification using a Gemini C6-phenyl column (Phenomenex, Torrance, CA). HPLC parameters for separation were as follows: solvent A, 0.1% formic acid in water; solvent B, 0.1% formic acid in acetonitrile; gradient, 0% B to 100% B in 20 min, maintain at 100% B for 15 min, return and maintain at 0% B for 15 min; flow rate 3 mL/min. The collected fractions were extracted with 2 volume of ethyl-acetate and the organic phase was dried under vacuum and yielded the pure compound as white power. <sup>1</sup>H NMR (600 MHz, CD<sub>3</sub>OD) δ 2.05 (s, 3H), 2.54 (s, 3H), 6.15 (s, 1H); <sup>13</sup>C NMR (600 MHz, CD<sub>3</sub>OD) δ 12.48, 19.63, 101.81, 107.89, 118.18, 142.95, 162.40, 163.86, 176.08. HRMS (ESI) Calcd. for [C<sub>9</sub>H<sub>9</sub>O<sub>4</sub>]<sup>-</sup> 181.0501, found 181.0463.

## 2. Purification and characterization of compound 5

Yeast transformant producing compound **5** was grown in 1.6 L SC-TRP-URA dropout media for 5 days. Cell pellets were collected by centrifugation. The supernatants were incubated with 10g of XAD-16 resin overnight. XAD-16 resins were collected via centrifugation and eluted with 200 mL of methanol. Cell pellets were extracted with acetone. The organic fractions of both extractions were combined and re-dissolved in 1 mL of methanol. Compound **5** was then purified by semi-preparative HPLC purification using a Luna C18 column (Phenomenex, Torrance, CA). HPLC parameters for separation were as follows: solvent A, 0.1% formic acid in water; solvent B, 0.1% formic acid in acetonitrile; gradient, 0% B to 100% B in 20 min, maintain at 100% B for 15 min, return and maintain at 0% B for 15 min; flow rate 3 mL/min. The collected fractions were extracted with 2 volume of ethyl-acetate and the organic phase was dried under vacuum and yielded the pure compound as white power.  $^1\text{H}$  NMR (600 MHz,  $\text{CDCl}_3$ )  $\delta$  2.10 (s, 3H), 2.46 (s, 3H), 6.19 (s, 1H), 10.17 (s, 1H), 12.45 (s, 1H);  $^{13}\text{C}$  NMR (600 MHz,  $\text{CDCl}_3$ )  $\delta$  10.74, 13.97, 100.64, 113.8, 115.63, 142.32, 161.49, 163.95, 193.53. HRMS (ESI) Calcd. for  $[\text{C}_9\text{H}_{11}\text{O}_3]^+$  167.0708, found 167.0711.

## 3. Quantification of compound 4 production from PKS gene ATEG\_03629 and its mutants

Plasmid carrying ATEG\_03629 or its single mutant ATEG\_03629m-S1651A, ATEG\_03629m-S1772A were co-transformed with plasmid pRS416-GPM1p-npgA-GPM1t to HZ848 strain. Each strain were grown in 3ml of SC-TRP-URA dropout media for 5 days. Cell pellets were collected by centrifugation. The supernatants were extracted by 2 volume of ethyl acetate and the cell pellets were extracted by acetone. All extracts were combined, dried and re-dissolved in 200ul of methanol. HPLC-ESI-MS was performed on an Agilent 1100 series LC/MSD XCT plus ion trap mass spectrometer (Agilent, Palo Alto, CA) with a reverse-phase kinetex C18 column (Phenomenex, Torrance, CA). HPLC parameters for detection of compounds **4** were as follows: solvent A, 0.1% formic acid in water; solvent B, 0.1% formic acid in acetonitrile; gradient, 0% B to 100% B in 60 min, maintain at 100% B for 10 min, return and maintain at 10% B for 7 min; flow rate 0.3 ml/min; detection by UV spectroscopy at 300 nm or 330nm. Isolated compound **4** were used as standard in the same HPLC condition for quantification.

## 4. Feeding study of the native host *A. terreus*

*A. terreus* was inoculated to 4 ml of YPAD medium and grow at 30°C and 250 rpm. 0.2 mg of compound **4** or DMSO (control) was added to the culture broth. After four days, the supernatants were extracted by 2 volume of ethyl acetate and the mycelia were extracted by methanol. All extracts were combined, dried and re-dissolved in 100  $\mu\text{L}$  of methanol for HPLC-MS analysis.
